# Supplementary material
Source: Springer Nature journal article supplement (https://www.springermedizin.de/resource/supplementary/13058_2011_2965_MOESM10_ESM.pdf/9702894)

# Supplementary Figure 2

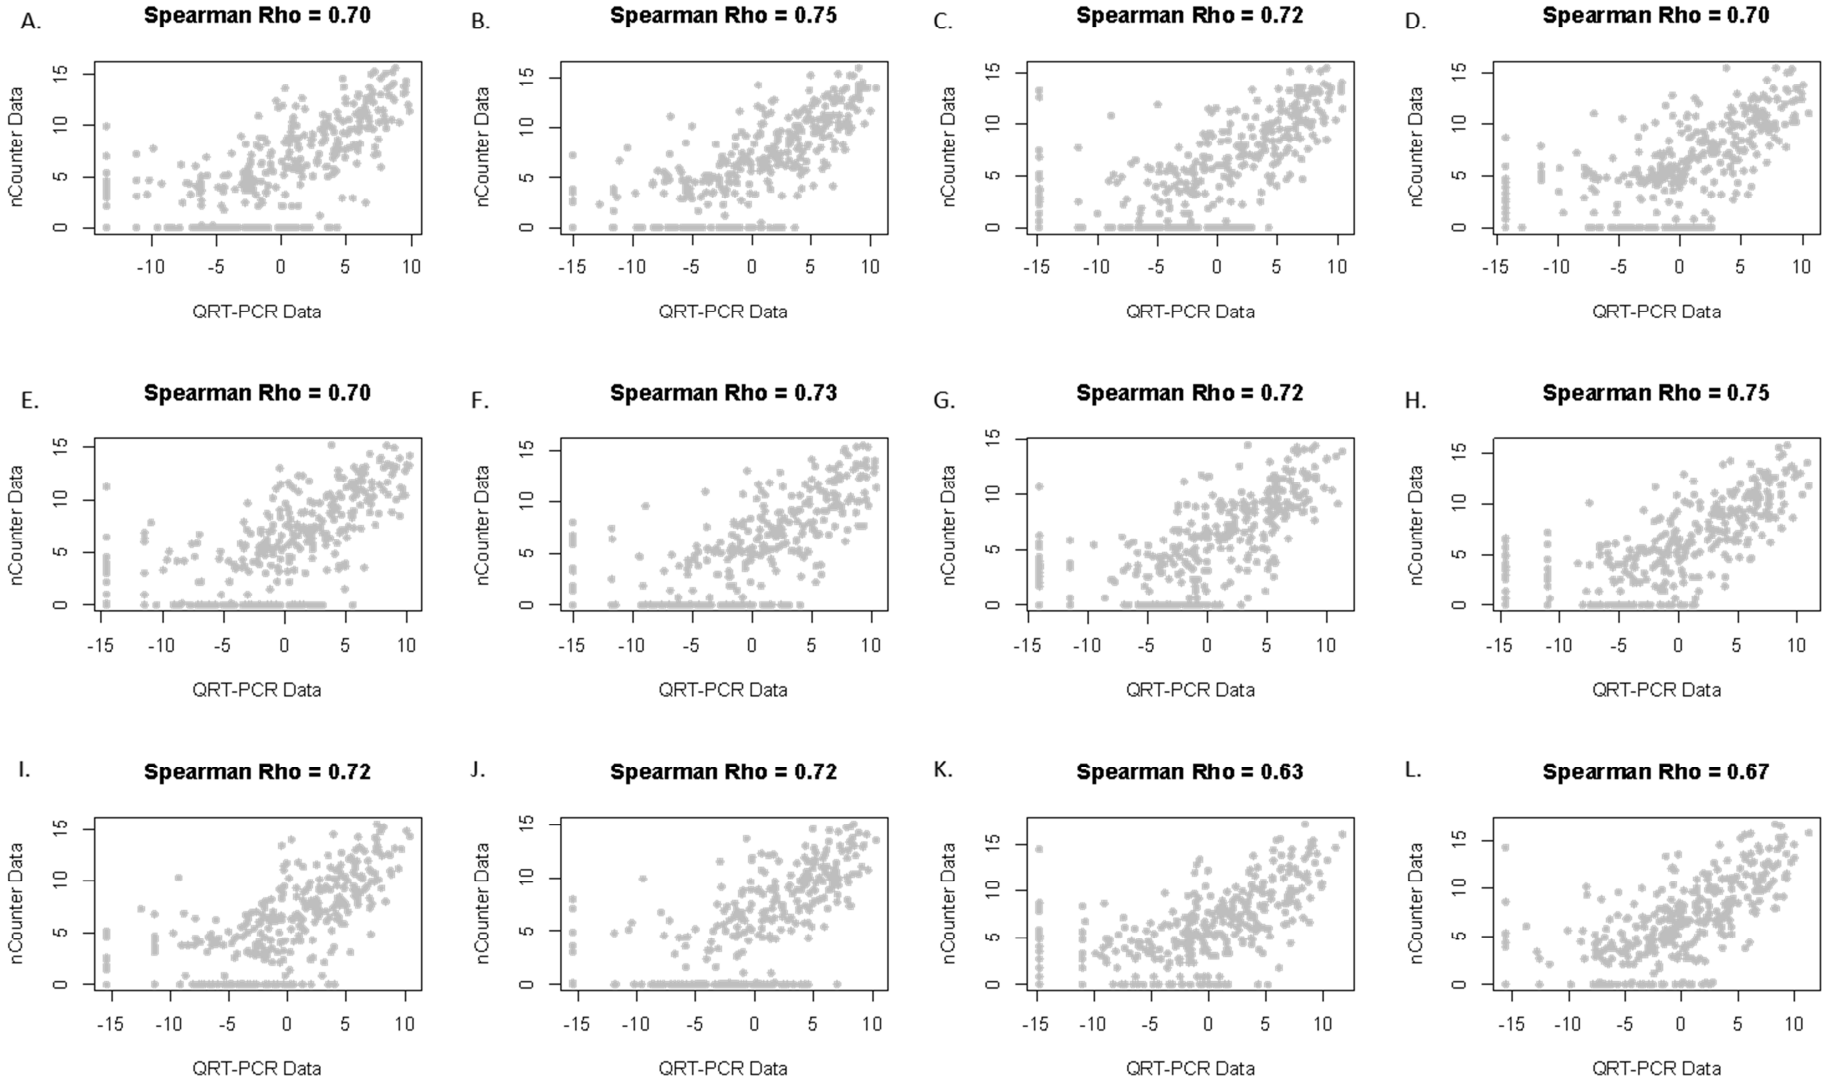

Supplement: MOESM10 [file 9702894]
